# Supplementary material for: Size Matters: An Evaluation of the Molecular Basis of Ontogenetic Modifications in the Composition of Bothrops jararacussu Snake Venom
Source: MDPI journal article supplement (doi:10.3390/toxins12120791), 2020-12-11
Supplement: s1 [file s1]

# Supplementary Materials: Size Matters: An Evaluation of the Molecular Basis of Ontogenetic Modifications in the Composition of *Bothrops jararacussu* Snake Venom

Luciana A. Freitas-de-Sousa, Pedro G. Nachtigall, José A. Portes-Junior, Matthew L. Holding, Gunnar S. Nystrom, Schyler A. Ellsworth, Noranathan C. Guimarães, Emilly Tioyama, Flora Ortiz, Bruno R. Silva, Tobias S. Kunz, Inácio L. M. Junqueira-de-Azevedo, Felipe G. Grazziotin, Darin R. Rokyt and Ana M. Moura-da-Silva

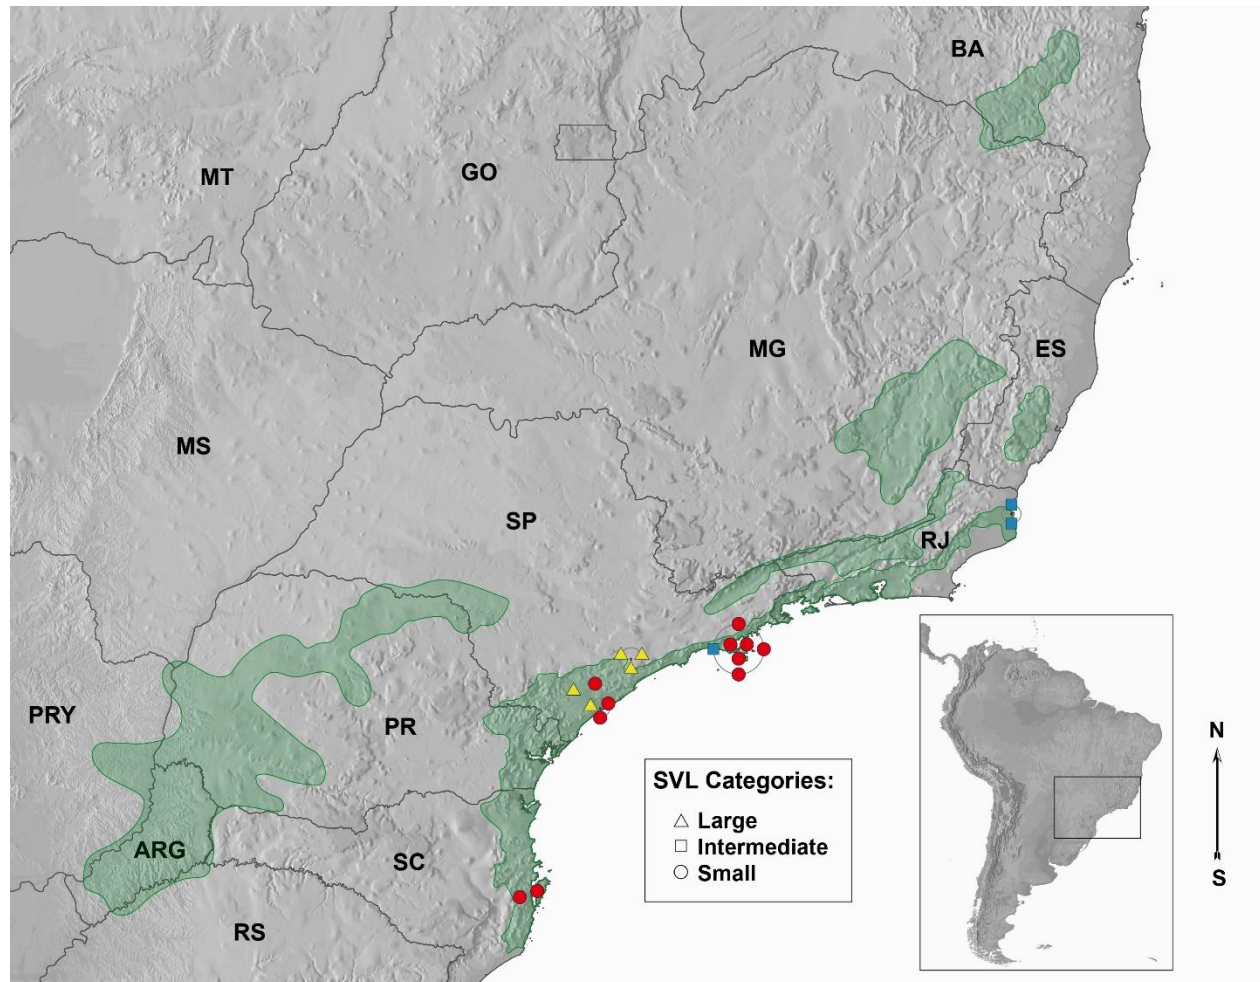

**Figure S1.** Geographical distribution of the nineteen *Bothrops jararacussu* snakes collected between 2017 and 2019 in the States of Rio de Janeiro, Santa Catarina and São Paulo, Brazil.

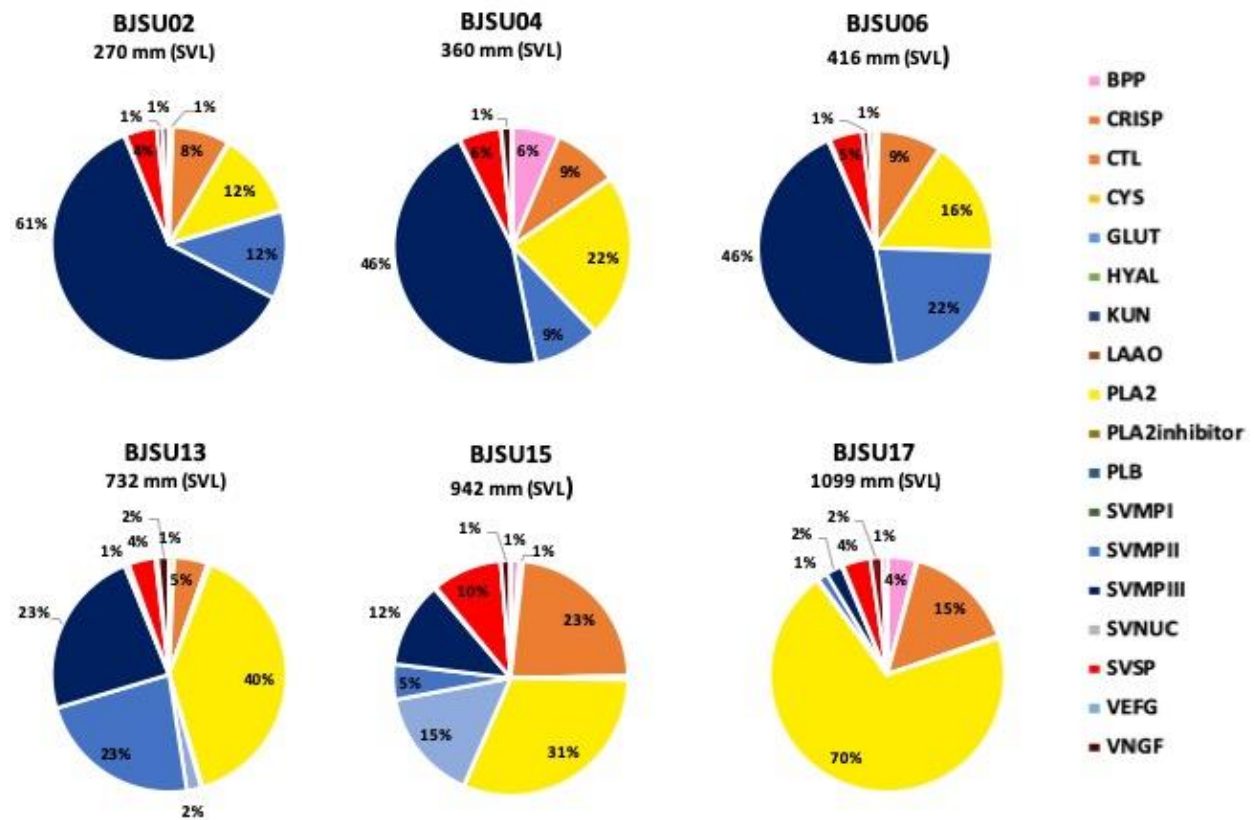

**Figure S2.** Distribution of the predicted toxin families expressed in the venom glands of 6 specimens of *Bothrops jararacussu* identified from transcriptomic analysis.

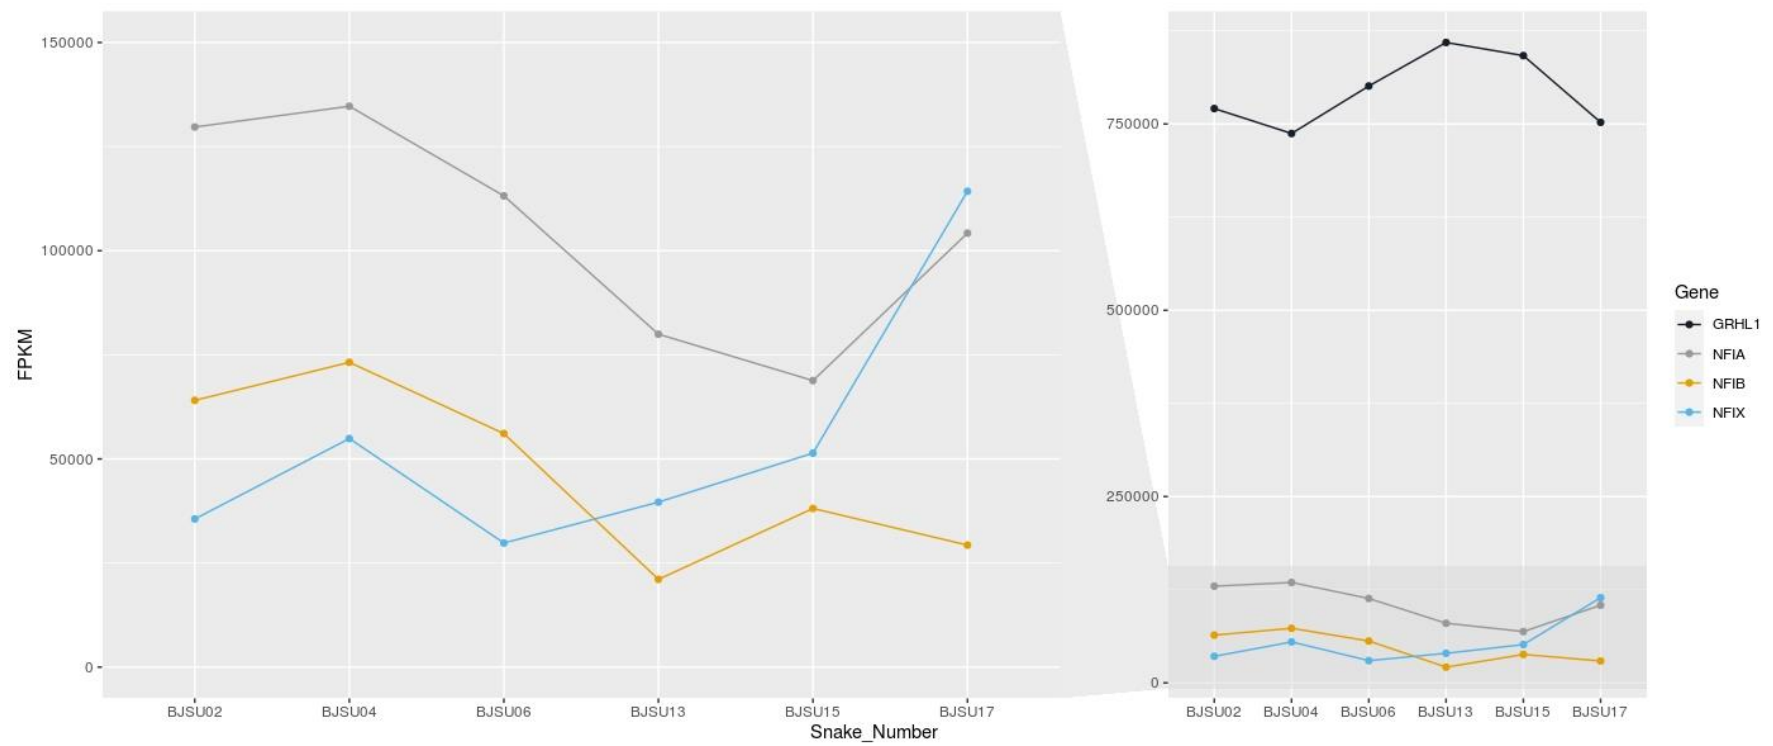

**Figure S3.** Distribution of the predicted Transcriptional Factors (TFs) expressed in the venom glands of 6 specimens from *Bothrops jararacussu*.

**Table S1.** Information on all *Bothrops jararacussu* snakes used in this study collected in Brazil between 2017 and 2019 in different seasons.

| Snake Code | Sample Origin        | Number Biota Project | Number IB Collection | SVL (mm) | TL (mm) | TotalL (mm) | Sex | Reproductive Status* | Use  |
|------------|----------------------|----------------------|----------------------|----------|---------|-------------|-----|----------------------|------|
| BJSU01     | Florianópolis-SC     | SB0970               | IBSP91234            | 257      | 45      | 302         | M   | juvenile             | P    |
| BJSU02     | Iguape-SP            | SB0335               | IBSP89934            | 270      | 48      | 318         | M   | juvenile             | T/P  |
| BJSU03     | Ilhabela-SP          | SB0819               | IBSP90672            | 350      | 50      | 400         | F   | juvenile             | Prot |
| BJSU04     | Juquiá-SP            | SB0147               | Nd                   | 360      | 57      | 417         | F   | juvenile             | T/P  |
| BJSU05     | Ilhabela-SP          | SB0818               | IBSP90671            | 364      | 63      | 427         | M   | juvenile             | Prot |
| BJSU06     | Iguape-SP            | SB0334               | IBSP89933            | 416      | 80      | 496         | M   | juvenile             | T/P  |
| BJSU07     | São Sebastião-RJ     | SB0054               | Nd                   | 445      | 56      | 501         | F   | juvenile             | P    |
| BJSU08     | Ilhabela-SP          | SB0822               | IBSP90675            | 480      | 63      | 543         | F   | juvenile             | P    |
| BJSU09     | Águas Mornas-SC      | SB0803               | IBSP90625            | 510      | 93      | 603         | M   | adult                | P    |
| BJSU10     | Ilhabela-SP          | SB0823               | IBSP90676            | 530      | 95      | 625         | M   | adult                | P    |
| BJSU11     | Ilhabela-SP          | SB0820               | IBSP90673            | 603      | 100     | 703         | M   | adult                | P    |
| BJSU12     | Ilhabela-SP          | SB0821               | IBSP90674            | 698      | 135     | 833         | M   | adult                | P    |
| BJSU13     | São João da Barra-RJ | SB0339               | IBSP89940            | 732      | 100     | 832         | F   | juvenile             | T/P  |
| BJSU14     | São João da Barra-RJ | SB0349               | IBSP89945            | 770      | Nd      | Nd          | M   | juvenile             | P    |
| BJSU15     | Juquitiba-SP         | SB0394               | IBSP90016            | 942      | 133     | 1075        | F   | juvenile             | T/P  |
| BJSU16     | Sete Barras-SP       | SB0100               | MZUSP23111           | 1086     | 150     | 1236        | F   | adult                | P    |
| BJSU17     | Juquitiba-SP         | SB0097               | MZUSP23108           | 1099     | 148     | 1247        | F   | adult                | T/P  |
| BJSU18     | Iguape-SP            | SB0324               | IBSP90100            | 1120     | Nd      | Nd          | F   | adult                | P    |
| BJSU19     | Juquitiba-SP         | SB0096               | MZUSP23109           | 1230     | 150     | 1380        | F   | adult                | P    |

SVL-Snout-Vent Length; TL- Tail Length; TotalL- Total Length; \* Reproductive Status defined by histological analyses; P – Proteomics; T- Transcriptomics; Nd- not determined.

**Table S2.** Number of reads obtained after sequencing by Illumina of the mRNA present in the *Bothrops jararacussu* venom gland and the number of contigs generated after *De novo* assembly.

| Snake Code | Number of Reads Generated | % of Merged* | Number of Contigs Generated |        |         |         |
|------------|---------------------------|--------------|-----------------------------|--------|---------|---------|
|            |                           |              | Extender                    | Ngen   | Trinity | Total   |
| BJSU02     | 32,469,211                | 80.98        | 2,078                       | 12,002 | 78,294  | 92,374  |
| BJSU04     | 27,981,666                | 88.75        | 2,218                       | 9,973  | 75,872  | 88,063  |
| BJSU06     | 14,467,807                | 81.13        | 1,679                       | 7,673  | 62,729  | 72,081  |
| BJSU13     | 17,598,257                | 83.38        | 1,829                       | 8,519  | 62,697  | 73,045  |
| BJSU15     | 17,720,275                | 84.11        | 1,802                       | 6,345  | 60,414  | 68,561  |
| BJSU17     | 33,042,215                | 84.88        | 2,289                       | 10,004 | 102,613 | 114,906 |

\* The paired reads were merged based on their 3' overlaps using PEAR version 0.9.6 (Zhang et al. 2014).
